# Supplementary material
Source: PubMed Central journal article supplement (PMC8440381)
Supplement: NIHMS1721836-supplement-supinfo.pdf [file NIHMS1721836-supplement-supinfo.pdf]

1 Supplemental Table S1. Survey Items for Emotional, Physical and Financial Mistreatment

| Mistreatment Type | Question                                                                                                                                                                                                                                                |
|-------------------|---------------------------------------------------------------------------------------------------------------------------------------------------------------------------------------------------------------------------------------------------------|
|                   | Since you turned 60...                                                                                                                                                                                                                                  |
| Emotional         | has anyone close to you called you names or put you down or made you feel badly?<br>have you felt that nobody wanted you around?<br>have you felt uncomfortable with anyone in your family?<br>has anyone told you that you gave them too much trouble? |
| Physical          | has anyone close to you tried to hurt or harm you?<br>have you been afraid of anyone in your family?                                                                                                                                                    |
| Financial         | has anyone taken things that belong to you without your OK?<br>has anyone borrowed your money without paying you back?                                                                                                                                  |

2  
3 Legend: Emotional mistreatment since age 60 was assessed with four survey items, physical  
4 mistreatment since age 60 with two survey items, and financial mistreatment since age 60 with  
5 two survey items. Response options were “Yes,” “No,” or “Don’t Know.”

6  
7

8 Supplemental Table S2. Associations Between Social Participation and Elder Mistreatment in  
 9 Older Women and Men (With Adjustments for Self-Reported Physical, Mental and Cognitive  
 10 Health)  
 11

| Formal social participation   | Women                                           | Emotional mistreatment AOR (95% CI) | Physical mistreatment AOR (95% CI) | Financial mistreatment AOR (95% CI) |
|-------------------------------|-------------------------------------------------|-------------------------------------|------------------------------------|-------------------------------------|
|                               | Attendance at organized meetings                | 1.26 (0.91-1.75)                    | 1.35 (0.71-2.59)                   | 1.18 (0.76-1.85)                    |
|                               | Attendance at religious services <sup>a</sup>   | 1.11 (0.80-1.55)                    | 0.96 (0.48-1.93)                   | 0.91 (0.71-1.16)                    |
|                               | Community volunteer work                        | 1.35 (0.99-1.86)                    | 1.34 (0.72-2.50)                   | 1.14 (0.82-1.57)                    |
|                               | Broad engagement in all activities <sup>b</sup> | <b>1.76 (1.15-2.69)</b>             | 0.78 (0.23-2.72)                   | 1.52 (0.94-2.46)                    |
| Formal social participation   | Men                                             | Emotional mistreatment AOR (95% CI) | Physical mistreatment AOR (95% CI) | Financial mistreatment AOR (95% CI) |
|                               | Attendance at organized meetings                | <b>1.53 (1.11-2.12)</b>             | 0.43 (0.09-2.05)                   | 1.29 (0.89-1.89)                    |
|                               | Attendance at religious services <sup>a</sup>   | 0.82 (0.51-1.34)                    | 1.32 (0.36-4.90)                   | <b>0.59 (0.37-0.92)</b>             |
|                               | Community volunteer work                        | 1.23 (0.83-1.83)                    | 0.95 (0.64-1.41)                   | 0.95 (0.64-1.41)                    |
|                               | Broad engagement in all activities <sup>b</sup> | 0.99 (0.48-2.05)                    | 0.58 (0.09-3.58)                   | 0.64 (0.34-1.20)                    |
| Informal social Participation | Women                                           | Emotional mistreatment AOR (95% CI) | Physical mistreatment AOR (95% CI) | Financial mistreatment AOR (95% CI) |
|                               | Socializing with friends and family             | 0.85 (0.61-1.18)                    | 1.53 (0.77-3.05)                   | 0.76 (0.53-1.10)                    |

| Informal social Participation | Men                                 | Emotional mistreatment AOR (95% CI) | Physical mistreatment AOR (95% CI) | Financial mistreatment AOR (95% CI) |
|-------------------------------|-------------------------------------|-------------------------------------|------------------------------------|-------------------------------------|
|                               | Socializing with friends and family | 0.90 (0.61-1.32)                    | 0.22 (0.05-0.93)                   | 0.85 (0.52-1.41)                    |

12 AOR = Adjusted Odds Ratio; 95% CI = 95% Confidence Interval.

13 Bolded results indicate  $p < .05$ .

14 Models adjusted for age, race/ethnicity, education, NSHAP Comorbidity Index, MoCA-SA, self-reported physical health, and self-reported mental health.

16 <sup>a</sup>For models examining attendance at religious services or broad engagement in all formal social activities, analyses were restricted to participants who reported a religious preference.

18 <sup>b</sup>Defined by involvement in all three forms of formal social participation at least monthly.

19 Associations involving formal social participation compare participants with monthly or more with participants with less than monthly involvement. Associations involving informal social participation compare individuals with weekly or more socializing with less than weekly socializing.
